# Supplementary material
Source: PubMed Central journal article supplement (PMC4474300)
Supplement: JVI.00489-15_zjv999090456so1.pdf [file JVI.00489-15_zjv999090456so1.pdf]

**GM1****GD1b****GM2****GD1a****Mad-1**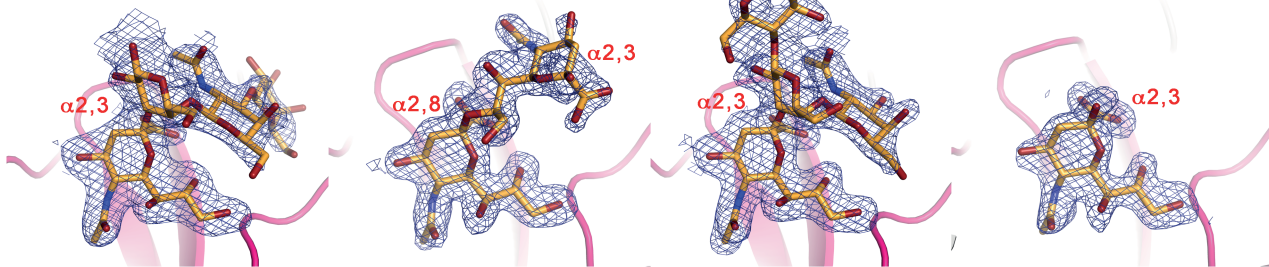**WT3**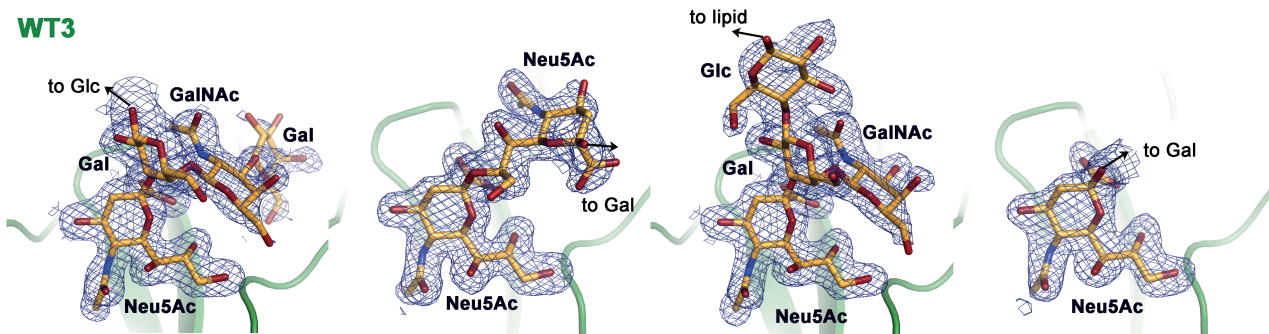**LSTc**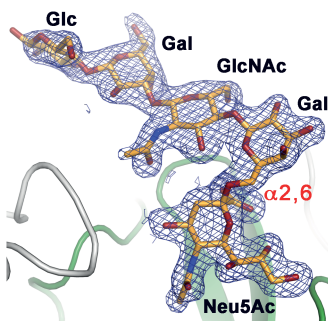

FIG. S1. Simulated annealing omit difference electron density maps for glycan complex structures of Mad-1 and WT3 VP1. Proteins are shown in cartoon representations and glycans as sticks colored according to the atom type (nitrogens in blue, oxygens in red and carbons in yellow). Fobs-Fcalc simulated annealing omit maps are shown at 3.0 sigma around 2.0 Å of the respective ligand.

**A Mad-1**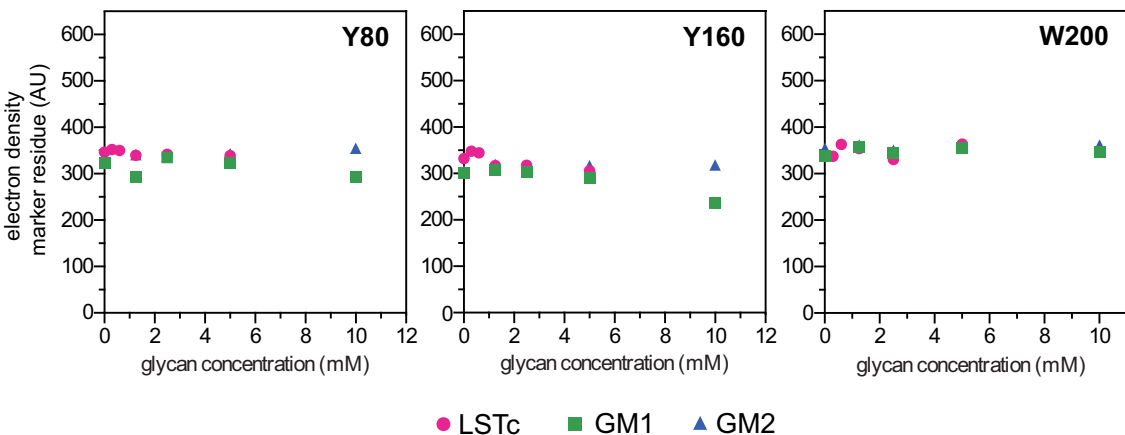**B WT3**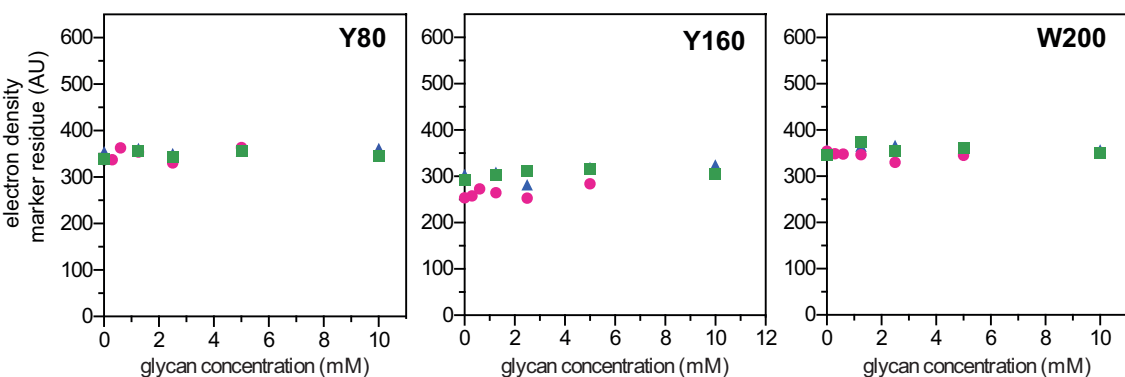

**FIG. S2.** Electron density integration within a 1.0 Å mask around marker residues of Mad-1 and WT3 VP1. In the JCPyV VP1 crystal environment only one binding site in the asymmetric unit is completely open towards the solvent, allowing engagement of all five ligands without steric hindrance or favorable interactions with a particular ligand. Therefore, statistic data analysis, calculation of the standard deviation, and cross-validation between binding sites was not possible for the electron density integration. Instead, Fobs-Fcalc simulated annealing omit electron densities maps for marker residues on the surface and in the hydrophobic core were integrated to test for the non-isomorphism of crystals and background differences of the electron density. Values for the electron density obtained by MAPMAN (53, 54) are plotted against the ligand concentrations, which were used in the concentration-dependent crystal soaking experiments. Representative examples are shown for experiments with LSTc, GM1, and GM2 glycans. The integrated electron density of marker atoms is independent of the ligand concentrations with standard deviations of about 1.5% to maximal 7% in rare cases.

## Supplementary Tables

**Table S1: Structures of native JCPyV WT3 VP1 and of JCPyV WT3 VP1 in complex with LSTc, GM1, GM2, GD1a and GD1a glycans.**

Data collection and structural refinement statistics. The space group is C2 in all cases.

|                                                         | WT3 VP1 native        | GM1 (10 mM)           | GM2 (20 mM)           | GD1a (10 mM)          | GD1b (10 mM)          | LSTc (5 mM)           |
|---------------------------------------------------------|-----------------------|-----------------------|-----------------------|-----------------------|-----------------------|-----------------------|
| <b>PDB accession code</b>                               | 4X0Y                  | 4X0Z                  | 4X10                  | 4X11                  | 4X12                  | 4X13                  |
| <b>Data Collection</b>                                  |                       |                       |                       |                       |                       |                       |
|                                                         | X06SA                 | X06SA                 | X06SA                 | X06DA                 | X06DA                 | X06DA                 |
| <i>a, b, c</i> [Å]                                      | 150.5, 96.8, 128.2    | 150.3, 95.9, 128.9    | 150.4, 96.1, 128.8    | 150.1, 96.1, 128.0    | 150.2, 96.3, 128.33   | 150.1, 96.3, 128.1    |
| $\beta$ [°]                                             | 110.6                 | 110.2                 | 110.2                 | 110.2                 | 110.3                 | 109.8                 |
| Resolution [Å]                                          | 30-1.70 (1.75-1.70)   | 30-1.85 (1.90-1.85)   | 30-1.90 (1.95-1.90)   | 30-2.25 (2.31-2.25)   | 30-1.90 (1.95-1.90)   | 30-2.00 (2.05-2.00)   |
| Unique reflections                                      | 187,337 (13,674)      | 143,308 (10,293)      | 131,009 (9,366)       | 81,125 (5,921)        | 134,142 (9,504)       | 115,162 (8,278)       |
| Total reflections                                       | 782,632 (57,482)      | 609,757 (41,002)      | 563,422 (38,910)      | 433,299 (27,562)      | 764,331 (46,179)      | 443,640 (32,140)      |
| CC <sub>1/2</sub>                                       | 99.2 (80.9)           | 99.6 (76.5)           | 99.4 (71.8)           | 99.5 (89.4)           | 99.6 (68.3)           | 99.6 (77.8)           |
| <i>R</i> <sub>meas</sub> [%]                            | 12.5 (58.9)           | 11.2 (73.7)           | 13.8 (85.5)           | 12.3 (80.8)           | 13.0 (84.7)           | 11.5 (65.8)           |
| <i>I</i> / $\sigma$ <i>I</i>                            | 9.1 (2.6)             | 11.5 (2.1)            | 9.9 (2.0)             | 16.1 (2.5)            | 13.6 (2.1)            | 15.0 (2.5)            |
| Completeness [%]                                        | 99.6 (98.4)           | 98.3 (96.0)           | 97.3 (94.3)           | 98.8 (89.1)           | 99.6 (95.9)           | 99.6 (97.3)           |
| Wilson B-factor [Å <sup>2</sup> ]                       | 22.1                  | 23.3                  | 24.8                  | 24.9                  | 21.8                  | 22.6                  |
| <b>Refinement</b>                                       |                       |                       |                       |                       |                       |                       |
| Resolution [Å]                                          | 30-1.70 (1.75-1.70)   | 30-1.85 (1.90-1.85)   | 30-1.90 (1.95-1.90)   | 30-2.3 (2.36-2.30)    | 30.0-1.90 (1.95-1.90) | 30-2.00 (2.05-2.00)   |
| <i>R</i> <sub>work</sub> / <i>R</i> <sub>free</sub> [%] | 15.7/17.8 (25.8/28.0) | 16.3/19.1 (24.4/27.2) | 16.4/19.6 (31.3/35.0) | 16.1/20.2 (22.6/28.5) | 15.8/18.7 (29.1/33.3) | 15.6/19.2 (22.5/25.4) |
| No. of atoms                                            |                       |                       |                       |                       |                       |                       |
| protein / carbohydrate                                  | 10,108/-              | 10,026/182            | 10,079/160            | 9,866/63              | 10,029/123            | 10,022/193            |
| water                                                   | 1,274                 | 1,284                 | 1,181                 | 809                   | 1,034                 | 1,063                 |
| Average B-Factor [Å <sup>2</sup> ]                      |                       |                       |                       |                       |                       |                       |
| protein / carbohydrate                                  | 17.7/-                | 19.6/30.6             | 22.4/34.9             | 19.9/22.5             | 18.4/29.6             | 20.5/29.0             |
| water                                                   | 28.7                  | 27.5                  | 31.4                  | 23.7                  | 27.1                  | 28.1                  |
| R.m.s. deviations                                       |                       |                       |                       |                       |                       |                       |
| bond length [Å]                                         | 0.009                 | 0.010                 | 0.008                 | 0.009                 | 0.008                 | 0.009                 |
| bond angles [°]                                         | 1.408                 | 1.437                 | 1.350                 | 1.320                 | 1.336                 | 1.356                 |

**Table S2: JCPyV Mad-1 VP1 pentamers in complex with LSTc, GM1, GM2, GD1a and GD1b glycans**

Data collection and structural refinement statistics. The space group is C2 in all cases.

|                                                         | <b>GM1 (10 mM)</b>    | <b>GM2 (20 mM)</b>    | <b>GD1a (10 mM)</b>   | <b>GD1b (10 mM)</b>   |
|---------------------------------------------------------|-----------------------|-----------------------|-----------------------|-----------------------|
| <b>PDB accession code</b>                               | 4X14                  | 4X15                  | 4X16                  | 4X17                  |
| <b>Data Collection</b>                                  |                       |                       |                       |                       |
|                                                         | X06SA                 | X06SA                 | X06DA                 | X06DA                 |
| <i>a</i> , <i>b</i> , <i>c</i> [Å]                      | 150.4, 95.6, 29.7     | 150.5, 95.7, 129.7    | 149.8, 95.6, 128.8    | 149.7, 95.4, 128.9    |
| $\beta$ [°]                                             | 110.2                 | 110.3                 | 110.3                 | 110.4                 |
| Resolution [Å]                                          | 30-2.30 (2.36-2.30)   | 30-2.11 (2.16-2.11)   | 30-1.80 (1.85-1.80)   | 30-1.75 (1.80-1.75)   |
| Unique reflections                                      | 75,740 (5,143)        | 99,141 (6,988)        | 157,148 (11,412)      | 170,305 (12,129)      |
| Total reflections                                       | 318,028 (21,120)      | 413,312 (26,434)      | 892,253 (61,049)      | 970,603 (63,839)      |
| CC <sub>1/2</sub>                                       | 99.4 (79.9)           | 99.3 (77.7)           | 99.8 (73.5)           | 99.8 (79.9)           |
| <i>R</i> <sub>meas</sub> [%]                            | 13.2 (76.9)           | 14.3 (75.7)           | 10.8 (86.9)           | 9.5 (71.0)            |
| <i>I</i> / $\sigma$ <i>I</i>                            | 11.2 (2.0)            | 9.1 (2.3)             | 15.4 (2.0)            | 15.5 (2.4)            |
| Completeness [%]                                        | 98.8 (91.1)           | 99.3 (94.8)           | 99.7 (98.2)           | 99.6 (96.2)           |
| Wilson B-factor [Å <sup>2</sup> ]                       | 31.0                  | 30.4                  | 22.6                  | 23.1                  |
| <b>Refinement</b>                                       |                       |                       |                       |                       |
| Resolution [Å]                                          | 30-2.30 (2.36-2.30)   | 30-2.11 (2.16-2.11)   | 30.0-1.80 (1.85-1.80) | 30-1.75 (1.80-1.75)   |
| <i>R</i> <sub>work</sub> / <i>R</i> <sub>free</sub> [%] | 18.8/21.1 (35.1/36.3) | 17.2/20.5 (28.7/31.0) | 16.6/19.1 (29.4/32.1) | 16.0/18.2 (26.9/29.4) |
| No. of atoms                                            |                       |                       |                       |                       |
| protein / carbohydrate                                  | 9,957/193             | 9,953/171             | 10,173/63             | 10,117/103            |
| water                                                   | 669                   | 891                   | 1,070                 | 1,163                 |
| Average B-Factor [Å <sup>2</sup> ]                      |                       |                       |                       |                       |
| protein / carbohydrate                                  | 27.2/41.8             | 25.4/39.1             | 19.4/27.9             | 18.7/30.8             |
| water                                                   | 29.1                  | 32.2                  | 28.9                  | 29.3                  |
| R.m.s. deviations                                       |                       |                       |                       |                       |
| bond length [Å]                                         | 0.009                 | 0.008                 | 0.010                 | 0.008                 |
| bond angles [°]                                         | 1.361                 | 1.324                 | 1.443                 | 1.373                 |

**Table S3: Data collection statistics of data sets for the concentration-dependent density integration of LSTc.** Crystals have the space group C2.

| <b>VP1</b>                         | <b>WT3</b>             | <b>WT3</b>             | <b>WT3</b>             | <b>WT3</b>             | <b>Mad-1</b>           | <b>Mad-1</b>           | <b>Mad-1</b>          | <b>Mad-1</b>           | <b>Mad-1</b>           | <b>Mad-1</b>           |
|------------------------------------|------------------------|------------------------|------------------------|------------------------|------------------------|------------------------|-----------------------|------------------------|------------------------|------------------------|
| <b>LSTc (mM)</b>                   | 0.31                   | 0.63                   | 1.25                   | 2.5                    | -                      | 0.31                   | 0.63                  | 1.25                   | 2.5                    | 5.0                    |
| beamline                           | X06DA                  | X06DA                  | X06DA                  | X06DA                  | X06SA                  | X06DA                  | X06DA                 | X06DA                  | X06DA                  | X06DA                  |
| Unit cell                          |                        |                        |                        |                        |                        |                        |                       |                        |                        |                        |
| <i>a</i> , <i>b</i> , <i>c</i> [Å] | 150.3, 96.8,<br>128.0  | 150.0, 96.5,<br>127.8  | 150.0, 96.9,<br>127.9  | 150.2, 96.7,<br>127.8  | 150.2, 96.7,<br>128.8  | 149.5, 97.3,<br>129.1  | 150.2, 96.5,<br>128.7 | 150.0, 96.4,<br>128.2  | 150.0, 96.5,<br>128.4  | 150.0, 96.4,<br>128.6  |
| $\beta$ [°]                        | 110.5                  | 110.3                  | 110.2                  | 110.1                  | 110.5                  | 110.2                  | 110.4                 | 110.4                  | 110.4                  | 110.3                  |
| Resolution [Å]                     | 30-1.80<br>(1.85-1.80) | 30-1.80<br>(1.85-1.80) | 30-1.80<br>(1.85-1.80) | 30-2.10<br>(2.15-2.10) | 30-2.00<br>(2.06-2.00) | 30-2.00<br>(2.05-2.00) | 30-1.85<br>(1.90-185) | 30-2.00<br>(2.05-2.00) | 30-2.00<br>(2.05-2.00) | 30-2.00<br>(2.05-2.00) |
| Unique reflections                 | 158,177<br>(11,321)    | 157,331<br>(11,411)    | 157,639<br>(11,353)    | 99,844<br>(7,182)      | 114,410<br>(8,216)     | 115,891<br>(7,552)     | 145,564<br>(10,393)   | 115,158<br>(8,442)     | 113,914<br>(7,948)     | 115,576<br>(8,494)     |
| Total reflections                  | 662,748<br>(46,154)    | 662,524<br>(43,426)    | 667,378<br>(46,437)    | 424,630<br>(30,167)    | 482,593<br>(34,735)    | 481,090<br>(28,957)    | 616,941<br>(43,853)   | 486,667<br>(32,835)    | 488,740<br>(31,561)    | 488,619<br>(33,443)    |
| CC <sub>1/2</sub>                  | 99.7 (70.4)            | 99.6 (77.0)            | 99.7 (79.7)            | 99.2 (75.2)            | 99.2 (75.4)            | 99.5 (80.3)            | 99.7 (72.6)           | 99.4 (72.2)            | 99.5 (74.2)            | 99.4 (64.3)            |
| <i>R</i> <sub>meas</sub> [%]       | 11.3 (76.4)            | 10.9 (59.8)            | 9.8 (62.1)             | 15.5 (68.9)            | 15.6 (74.2)            | 13.5 (77.9)            | 11.4 (77.5)           | 15.7 (78.5)            | 14.1 (71.5)            | 14.3 (80.7)            |
| <i>I</i> / $\sigma$ <i>I</i>       | 12.6 (2.1)             | 11.7 (2.6)             | 14.0 (2.6)             | 11.7 (2.5)             | 8.5 (2.2)              | 9.5 (2.1)              | 11.2 (2.2)            | 9.7 (2.2)              | 10.7 (2.3)             | 10.5 (2.00)            |
| Completeness [%]                   | 99.6 (96.8)            | 99.7 (98.0)            | 99.6 (97.5)            | 99.6 (97.4)            | 98.7 (95.9)            | 98.9 (87.6)            | 99.5 (96.2)           | 99.6 (98.7)            | 98.1 (92.3)            | 99.7 (98.8)            |
| Wilson B-factor [Å <sup>2</sup> ]  | 21.9                   | 21.0                   | 21.7                   | 21.8                   | 26.3                   | 27.2                   | 25.6                  | 25.8                   | 25.4                   | 25.3                   |

**Table S4: Data collection statistics of data sets used for the concentration-dependent density integration of the GM1 glycan. Crystals have the space group C2.**

| <b>VP1</b>                        | <b>WT3</b>          | <b>WT3</b>          | <b>WT3</b>          | <b>Mad-1</b>        | <b>Mad-1</b>        | <b>Mad-1</b>        |
|-----------------------------------|---------------------|---------------------|---------------------|---------------------|---------------------|---------------------|
| <b>GM1 (mM)</b>                   | 1.25                | 2.5                 | 5                   | 1.25                | 2.5                 | 5                   |
| beamline                          | X06SA               | X06SA               | X06SA               | X06SA               | X06SA               | X06SA               |
| Unit cell                         |                     |                     |                     |                     |                     |                     |
| <i>a, b, c</i> [Å]                | 150.4, 96.8, 128.5  | 150.5, 96.2, 129.0  | 150.6, 96.6, 129.3  | 150.4, 96.3, 128.9  | 150.4, 95.9, 129.5  | 150.0, 95.5, 129.2  |
| $\beta$ [°]                       | 110.3               | 110.3               | 110.3               | 110.5               | 110.4               | 110.2               |
| Resolution [Å]                    | 30-1.80 (1.85-1.80) | 30-1.80 (1.85-1.80) | 30-1.80 (1.85-1.81) | 30-1.80 (1.85-1.80) | 30-2.00 (2.06-2.00) | 30-1.80 (1.85-1.80) |
| Unique reflections                | 158,084 (11,327)    | 158,032 (11,485)    | 158,601 (11,373)    | 155,805 (11,186)    | 114,858 (8,177)     | 154,151 (11,336)    |
| Total reflections                 | 659,532 (45,540)    | 660,134 (47,014)    | 662,871 (46,212)    | 661,296 (46,700)    | 481,966 (33,639)    | 639,240 (46,812)    |
| CC <sub>1/2</sub>                 | 98.5 (74.5)         | 99.1 (71.0)         | 99.4 (80.8)         | 98.6 (81.6)         | 99.4 (78.8)         | 99.6 (82.1)         |
| <i>R</i> <sub>meas</sub> [%]      | 16.0 (77.5)         | 14.2 (76.3)         | 11.9 (64.1)         | 14.3 (55.0)         | 14.4 (77.2)         | 10.6 (65.3)         |
| <i>I</i> / $\sigma$ <i>I</i>      | 7.0 (1.9)           | 7.9 (2.0)           | 9.4 (2.4)           | 7.7 (2.8)           | 8.9 (2.2)           | 11.0 (2.5)          |
| Completeness [%]                  | 99.5 (97.0)         | 99.7 (98.0)         | 99.5 (96.9)         | 98.1 (95.3)         | 99.3 (96.0)         | 97.9 (97.5)         |
| Wilson B-factor [Å <sup>2</sup> ] | 24.0                | 24.3                | 23.8                | 26.6                | 27.9                | 24.7                |

**Table S5: Data collection statistics of the additional data sets used for the concentration dependent density integration for the GM2 glycan.** Crystals have the space group C2.

| VP1                               | WT3                    | WT3                    | WT3                    | WT3                    | Mad-1                  | Mad-1                  | Mad-1                  | Mad-1                  |
|-----------------------------------|------------------------|------------------------|------------------------|------------------------|------------------------|------------------------|------------------------|------------------------|
| GM2 (mM)                          | 1.25                   | 2.5                    | 5                      | 10                     | 1.25                   | 2.5                    | 5                      | 10                     |
| beamline                          | X06SA                  |
| Unit cell                         |                        |                        |                        |                        |                        |                        |                        |                        |
| a, b, c [Å]                       | 150.3, 96.4,<br>128.2  | 151.3, 97.2,<br>128.8  | 150.8, 96.3,<br>128.6  | 150.9, 96.5,<br>128.7  | 150.1, 96.0,<br>128.9  | 150.2, 96.1,<br>129.0  | 150.3, 96.0,<br>129.3  | 150.1, 95.6,<br>129.3  |
| β [°]                             | 110.4                  | 110.3                  | 110.3                  | 110.4                  | 110.4                  | 110.4                  | 110.4                  | 110.4                  |
| Resolution [Å]                    | 30-1.80<br>(1.85-1.80) | 30-2.11<br>(2.16-2.11) | 30-2.00<br>(2.06-2.01) | 30-1.70<br>(1.75-1.70) | 30-1.80<br>(1.85-1.80) | 30-1.90<br>(1.95-1.90) | 30-1.80<br>(1.85-1.80) | 30-1.80<br>(1.85-1.80) |
| Unique reflections                | 152,248 (10,494)       | 99,824 (6,994)         | 115,134 (8,255)        | 188,271 (13,716)       | 154,257 (11,103)       | 134,315 (9,581)        | 157,972 (1,581)        | 157,529 (11,343)       |
| Total reflections                 | 637,365 (43,358)       | 414,098 (27,757)       | 481,083 (34,136)       | 788,337 (56,634)       | 663,743 (48,147)       | 563,375 (39,404)       | 664,477 (48,821)       | 662,083 (47,766)       |
| CC <sub>1/2</sub>                 | 99.3 (82.9)            | 99.3 (78.5)            | 99.5 (79.7)            | 97.2 (69.1)            | 99.6 (75.7)            | 99.7 (78.8)            | 99.2 (79.7)            | 98.4 (86.2)            |
| R <sub>meas</sub> [%]             | 13.0 (61.4)            | 13.1 (63.6)            | 14.0 (73.1)            | 19.8 (76.7)            | 10.3 (76.3)            | 10.6 (73.3)            | 12.7 (60.8)            | 15.4 (51.9)            |
| I/σ                               | 8.8 (2.5)              | 9.7 (2.6)              | 11.48 (2.66)           | 5.4 (1.9)              | 10.7 (2.2)             | 11.4 (2.2)             | 8.4 (2.4)              | 7.1 (2.7)              |
| Completeness [%]                  | 96.0 (89.8)            | 99.4 (94.7)            | 99.5 (96.5)            | 99.7 (98.6)            | 97.6 (95.0)            | 99.5 (96.7)            | 99.7 (98.7)            | 99.6 (97.2)            |
| Wilson B-factor [Å <sup>2</sup> ] | 22.3                   | 28.2                   | 24.2                   | 24.7                   | 26.7                   | 26.1                   | 25.2                   | 25.1                   |

**Table S6: Data collection statistics of the additional data sets used for the concentration dependent density integration for the GD1a glycan.** Crystals have the space group C2.

| VP1                               | WT3                    | WT3                     | WT3                      | WT3                    | Mad-1                  | Mad-1                  | Mad-1                  | Mad-1                  |
|-----------------------------------|------------------------|-------------------------|--------------------------|------------------------|------------------------|------------------------|------------------------|------------------------|
| GD1a (mM)                         | 0.63                   | 1.25                    | 2.5                      | 5                      | 0.63                   | 1.25                   | 2.5                    | 5                      |
| beamline                          | X06DA                  | X06DA                   | X06DA                    | X06DA                  | X06DA                  | X06DA                  | X06DA                  | X06DA                  |
| Unit cell                         |                        |                         |                          |                        |                        |                        |                        |                        |
| a, b, c [Å]                       | 150.2, 96.0,<br>128.1  | 149.9, 95.7,<br>128.1   | 150.5, 96.1,<br>128.5    | 150.3, 96.2,<br>128.2  | 150.1, 96.2,<br>128.5  | 149.8, 95.5,<br>128.5  | 149.8, 95.8,<br>128.7  | 149.9, 95.8,<br>128.8  |
| β [°]                             | 110.3                  | 110.3                   | 110.4                    | 110.2                  | 110.4                  | 110.3                  | 110.4                  | 110.4                  |
| Resolution [Å]                    | 30-2.05<br>(2.10-2.05) | 30-1.85 (1.90-<br>1.85) | 30.0-1.90<br>(1.95-1.90) | 30-2.40<br>(2.46-2.40) | 30-1.60<br>(1.64-1.60) | 30-1.65<br>(1.69-1.65) | 30-1.90<br>(1.95-1.90) | 30-1.75<br>(1.80-1.75) |
| Unique reflections                | 106,508 (7,661)        | 144,017 (10,301)        | 134,218 (9,235)          | 66,652 (4,604)         | 224,814 (16,388)       | 200,663 (14,146)       | 133,940 (9,734)        | 171,089 (12,331)       |
| Total reflections                 | 608,355 (40,545)       | 826,671 (52,526)        | 767,567 (49,522)         | 376,400 (23,692)       | 1,269,968 (86,946)     | 1,052,395 (68,886)     | 764,945 (48,815)       | 953,738 (62,373)       |
| CC <sub>1/2</sub>                 | 99.3 (79.8)            | 99.7 (81.8)             | 99.7 (76.2)              | 99.2 (78.8)            | 99.9 (79.5)            | 99.9 (85.2)            | 99.7 (76.7)            | 99.8 (80.4)            |
| R <sub>meas</sub> [Å]             | 16.5 (79.7)            | 12.3 (12.3)             | 13.3 (90.7)              | 15.3 (74.0)            | 7.0 (75.7)             | 6.8 (64.6)             | 12.1 (81.5)            | 9.7 (77.7)             |
| I/σ                               | 13.0 (2.3)             | 14.04 (2.5)             | 13.5 (2.0)               | 14.4 (2.6)             | 19.1 (2.5)             | 18.9 (2.6)             | 14.7 (2.2)             | 15.1 (2.3)             |
| Completeness [%]                  | 99.6 (97.6)            | 99.6 (96.4)             | 99.3 (92.9)              | 99.2 (92.6)            | 99.7 (98.5)            | 98.5 (94.6)            | 99.7 (98.6)            | 99.7 (97.6)            |
| Wilson B-factor [Å <sup>2</sup> ] | 21.1                   | 21.1                    | 22.7                     | 21.4                   | 22.4                   | 22.5                   | 22.4                   | 22.5                   |



**Table S7: Data collection statistics of the additional data sets used for the concentration dependent density integration for the GD1b glycan.** Crystals have the space group C2.

| VP1                               | WT3                    | WT3                     | WT3                    | WT3                    | Mad-1                  | Mad-1                   | Mad-1                  | Mad-1                  |
|-----------------------------------|------------------------|-------------------------|------------------------|------------------------|------------------------|-------------------------|------------------------|------------------------|
| GD1b (mM)                         | 0.63                   | 1.25                    | 2.5                    | 5                      | 0.63                   | 1.25                    | 2.5                    | 5                      |
| Data Collection                   | X06DA                  | X06DA                   | X06DA                  | X06DA                  | X06DA                  | X06DA                   | X06DA                  | X06DA                  |
| Unit cell                         |                        |                         |                        |                        |                        |                         |                        |                        |
| a, b, c [Å]                       | 145.0, 96.2,<br>128.0  | 150.4, 96.3,<br>128.4   | 150.2, 96.3,<br>128.2  | 150.1, 96.4,<br>128.2  | 149.8, 95.8,<br>128.4  | 149.8, 95.8,<br>128.4   | 149.8, 95.6,<br>128.8  | 149.9, 95.4,<br>128.9  |
| β [°]                             | 110.4                  | 110.3                   | 110.6                  | 110.3                  | 110.4                  | 110.4                   | 110.3                  | 110.3                  |
| Resolution [Å]                    | 30-1.85<br>(1.90-1.85) | 30-1.95<br>(2.00- 1.95) | 30-1.85<br>(1.90-1.85) | 30-1.90<br>(1.95-1.90) | 30-1.75<br>(1.80-1.75) | 30-1.80<br>(1.85- 1.80) | 30-1.90<br>(1.95-1.90) | 30-2.10<br>(2.15-2.10) |
| Unique reflections                | 144,880 (10,544)       | 123,742 (8,470)         | 144,803 (10,370)       | 134,448 (9,647)        | 166,353 (11,910)       | 157,123 (11,513)        | 132,768 (9,444)        | 98,777 (7,210)         |
| Total reflections                 | 823,303 (54,911)       | 707,337 (45,494)        | 832,599 (53,184)       | 765,085 (47,900)       | 932,942 (61,102)       | 896,684 (58,683)        | 711,947 (43,508)       | 536,551 (35,871)       |
| CC <sub>1/2</sub>                 | 99.5 (78.7)            | 99.6 (79.9)             | 99.7 (75.4)            | 99.6 (71.3)            | 99.8 (80.6)            | 99.8 (82.9)             | 99.5 (75.3)            | 99.5 (83.0)            |
| R <sub>meas</sub> (%)             | 15.3 (84.8)            | 15.2 (90.4)             | 12.2 (78.1)            | 13.1 (79.2)            | 9.6 (67.3)             | 10.3 (77.0)             | 13.5 (80.0)            | 13.3 (69.4)            |
| I/σ                               | 10.5 (2.3)             | 13.7 (2.8)              | 14.2 (2.3)             | 13.6 (2.2)             | 16.0 (2.6)             | 16.2 (2.4)              | 12.3 (2.1)             | 14.1 (2.6)             |
| Completeness [%]                  | 99.8 (98.5)            | 99.3 (92.3)             | 99.7 (96.9)            | 99.7 (97.4)            | 97.1 (94.4)            | 99.8 (98.8)             | 99.0 (95.5)            | 99.2 (97.8)            |
| Wilson B-factor [Å <sup>2</sup> ] | 21.2                   | 23.9                    | 22.5                   | 21.7                   | 22.6                   | 22.1                    | 22.0                   | 23.6                   |

### Annotation for Tables S1-S7:

Values for the highest resolution bin are given in parentheses.

CC<sub>1/2</sub>: correlation between intensities from random half-dataset

$R_{meas} = \frac{\sum_{hkl} \sqrt{\frac{n}{n-1}} \sum_{j=1}^n |I_{hkl,j} - \langle I_{h,k,l} \rangle|}{\sum_{hkl} \sum_j^n I_{hkl,j}}$ , with n is the number of observation of the reflection and  $\langle I_{h,k,l} \rangle$  the intensity of symmetry- (or Friedel-) related observations.

$R_{work} = \frac{\sum_{hkl} |F_{obs}(hkl) - F_{calc}(hkl)|}{\sum_{hkl} F_{obs}(hkl)}$ , F<sub>obs</sub> and F<sub>calc</sub> are the observed and calculated structure factors, respectively. 5% of reflections were not used during structure refinement to calculate R<sub>free</sub>.
